# Supplementary material
Source: MDPI journal article supplement (https://www.mdpi.com/2077-0472/13/10/1991)
Supplement: s1 [file s1]

**Table S3.** Volatile emissions of compounds detected in the headspace of full-sized bur clusters collected in early September from Varnavas (SBV), Fenos (SBF) and Kastanitsa (SBK), expressed in  $\mu\text{g h}^{-1} \pm \text{SE}$ .

| RI <sup>1</sup> | RI <sup>2</sup> | Compound                    | SBV                     | SBF        | SBK          | X <sup>2</sup> | df, n | p     |
|-----------------|-----------------|-----------------------------|-------------------------|------------|--------------|----------------|-------|-------|
| 850             | 849             | (Z)-3-Hexen-1-ol            | 0.68±0.25               | 0.42±0.07  | 0.34±0.03    | 0.822          | 2, 17 | 0.663 |
| 924             | 925             | $\alpha$ -thujene           | 0.05±0.02               |            |              |                |       |       |
| 932             | 929             | $\alpha$ -pinene            | 0.64±0.28b <sup>3</sup> | 0.18±0.03b | 0.01±0.00a   | 9.266          | 2, 18 | 0.010 |
| 946             | 947             | Camphene                    | 0.07±0.02               | 0.07±0.04  |              | 1.000          | 1, 13 | 0.317 |
| 969             | 970             | Sabinene                    | 13.41±6.34              | 4.34±0.89  | 0.77±0.29    | 4.984          | 2, 18 | 0.083 |
| 974             | 978             | $\beta$ -pinene             | 1.40±0.65               | 0.35±0.06  |              | 0.331          | 1, 14 | 0.565 |
| 988             | 988             | $\beta$ -Myrcene            | 3.36±1.69               | 0.68±0.14  | 0.02±0.00    | 5.322          | 2, 16 | 0.070 |
| 981             | 988             | 6-Methyl-5-hepten-2-one     |                         |            | 0.07±0.00    |                |       |       |
| 1004            | 1008            | (Z)-3-Hexenyl acetate       | 0.62±0.25               | 0.67±0.29  | 0.39±0.10    | 0.172          | 2, 18 | 0.918 |
| 1010            | 1013            | (E)-2-Hexenyl acetate       | 0.05±0.01               |            |              |                |       |       |
| 1014            | 1016            | $\alpha$ -Terpinene         | 0.10±0.05               | 0.11±0.08  |              | 0.240          | 1, 9  | 0.624 |
| 1020            | 1025            | p-cymene                    | 0.12±0.08               | 0.18±0.16  |              | <0.001         | 1, 5  | 1.000 |
| 1030            | 1029            | Limonene                    | 0.92±0.47b              | 0.45±0.16b | 0.07±0.01a   | 7.627          | 2, 18 | 0.022 |
| 1031            | 1030            | $\beta$ -phelladrene        | 0.24±0.11               | 0.08±0.05  |              | 1.200          | 1, 11 | 0.273 |
| 1026            | 1031            | eucalyptol                  | 0.24±0.09               | 0.07±0.05  |              | 3.333          | 1, 11 | 0.068 |
| 1032            | 1035            | (Z)- $\beta$ -Ocimene       | 1.37±0.79b              | 0.12±0.05a |              | 4.000          | 1, 13 | 0.046 |
| 1044            | 1048            | (E)- $\beta$ -Ocimene       | 7.56±3.64               | 2.77±1.00  | 0.03±0.00    | 5.852          | 2, 16 | 0.054 |
|                 | 1055            | Unknown 1                   | 0.08±0.02               |            |              |                |       |       |
| 1059            | 1059            | $\gamma$ -Terpinene         | 0.21±0.12               | 0.13±0.06  |              | 0.641          | 1, 12 | 0.423 |
| 1086            | 1085            | $\alpha$ -terpinolene       | 0.08±0.03               | 0.09±0.03  |              | 0.125          | 1, 7  | 0.724 |
| 1100            | 1107            | n-Nonanal                   | 0.13±0.06               | 0.05±0.02  | 0.01±0.00    | 4.711          | 2, 16 | 0.095 |
| 1117            | 1117            | (E)-DMNT                    | 0.21±0.06b              | 0.04±0.01a |              | 9.800          | 1, 14 | 0.002 |
| 1128            | 1128            | (E)-Allo-ocimene            | 0.39±0.26               |            |              |                |       |       |
| 1184            | 1184            | 4-Terpineol                 | 0.23±0.18               |            |              |                |       |       |
| 1187            | 1192            | n-dodecene                  | 0.05±0.02               | 0.07±0.02  |              | 0.033          | 1, 11 | 0.855 |
| 1200            | 1199            | n-Dodecane                  | 0.03±0.02               | 0.04±0.01  |              | 0.556          | 1, 8  | 0.456 |
| 1209            | 1209            | Decanal                     | 0.12±0.05               | 0.09±0.04  | 0.04±0.01    | 1.527          | 2, 13 | 0.466 |
|                 | 1258            | Unknown 3                   | 0.05±0.01               | 0.06±0.02  | 0.01±0.01    | 2.308          | 2, 12 | 0.315 |
|                 | 1267            | m-Ethylacetophenone         | 0.12±0.02a              | 0.22±0.04b | 0.15±0.02a,b | 7.668          | 2, 16 | 0.022 |
| 1279            | 1288            | p-Ethylacetophenone         | 0.14±0.03a              | 0.33±0.05b | 0.20±0.02a,b | 9.617          | 2, 17 | 0.008 |
| 1290            | 1291            | n-Tridecene                 |                         | 0.04±0.02  |              |                |       |       |
| 1300            | 1300            | n-Tridecane                 |                         | 0.02±0.01  |              |                |       |       |
| 1400            | 1400            | n-Tetradecane               |                         | 0.02±0.01  |              |                |       |       |
| 1407            | 1409            | Longifolene                 | 0.05±0.01               |            |              |                |       |       |
| 1419            | 1419            | (E)- $\beta$ -Caryophyllene | 0.10±0.04b              | 0.10±0.04b | 0.03±0.00a   | 6.349          | 2, 17 | 0.042 |
| 1484            | 1480            | Germacrene D                | 0.06±0.01               |            |              |                |       |       |
|                 | 1491            | sesquiterpene               |                         | 0.05±0.00  |              |                |       |       |
| 1505            | 1504            | (E,E)- $\alpha$ -Farnesene  | 0.07±0.01a              | 0.15±0.03b |              | 4.121          | 1, 12 | 0.042 |
| 1582            | 1583            | Caryophyllene oxide         | 0.07±0.01               |            |              |                |       |       |
| 1828            | 1830            | Isopropyl myristate         |                         |            | 0.18±0.01    |                |       |       |

<sup>1</sup> RI: Retention Index values obtained from Adams [20] and the NIST database [21].

<sup>2</sup> RT: Retention Index values were calculated relative to C<sub>7–30</sub> n-alkanes on a column with 5% diphenyl/95% dimethyl polysiloxane stationary phase.

<sup>3</sup> Different letters within a row, are significantly differ based on the Kruskal–Wallis test (p = 0.05).
