# Supplementary material
Source: MDPI journal article supplement (https://www.mdpi.com/2077-0472/13/10/1991)
Supplement: s1 [file s1]

**Table S2.** Volatile emissions of compounds detected in the headspace of newly fresh burs collected in mid-July from Varnavas (JBV), Fenos (JBF) and Kastanitsa (JBK), expressed in  $\mu\text{g h}^{-1} \pm \text{SE}$ .

| RI <sup>1</sup> | RI <sup>2</sup> | Compound                         | JBV                     | JBF            | JBK        | X <sup>2</sup> | df, n | p      |
|-----------------|-----------------|----------------------------------|-------------------------|----------------|------------|----------------|-------|--------|
| 850             | 849             | (Z)-3-Hexen-1-ol                 | 0.83±0.16a <sup>3</sup> | 1.50±0.29a,b   | 2.24±0.39b | 9.318          | 2, 25 | 0.009  |
| 894             | 889             | 1-Nonene                         |                         | 0.15±0.04      |            |                |       |        |
| 900             | 900             | n-Nonane                         |                         | 0.30±0.10      |            |                |       |        |
| 924             | 925             | $\alpha$ -thujene                | 0.82±0.35               | 0.30±0.13      |            | 0.576          | 1, 48 | 0.448  |
| 932             | 929             | $\alpha$ -pinene                 | 4.42±1.78b              | 2.88±0.92b     | 0.29±0.01a | 11.572         | 2, 25 | 0.003  |
| 946             | 947             | Camphene                         | 0.58±0.10a,b            | 1.15±0.21b     | 0.08±0.02a | 15.087         | 2, 25 | <0.001 |
| 969             | 970             | Sabinene                         | 54.43±18.21b            | 40.36±14.61a,b | 5.41±0.57a | 7.796          | 2, 25 | 0.020  |
| 974             | 978             | $\beta$ -pinene                  | 5.64±1.88b              | 4.55±1.46b     | 0.25±0.05a | 11.631         | 2, 25 | 0.003  |
| 988             | 988             | $\beta$ -Myrcene                 | 19.88±8.02b             | 12.63±5.86b    | 0.75±0.07a | 12.369         | 2, 25 | 0.002  |
| 981             | 988             | 6-Methyl-5-hepten-2-one          |                         |                | 0.11±0.02  |                |       |        |
| 1000            | 1000            | n-decane                         | 0.14±0.03               | 0.21±0.04      |            | 1.651          | 1, 20 | 0.199  |
| 1001            | 1002            | 2- $\delta$ -carene              | 0.05±0.02               |                |            |                |       |        |
| 1002            | 1004            | $\alpha$ -Phellandrene           |                         | 0.09±0.05      |            |                |       |        |
| 1001            | 1006            | (E)-3-Hexenyl acetate            | 0.06±0.02               | 0.07±0.01      | 0.05±0.01  | 0.600          | 2, 14 | 0.741  |
| 1004            | 1008            | (Z)-3-Hexenyl acetate            | 7.81±1.95               | 9.64±1.93      | 7.10±0.82  | 0.892          | 2, 25 | 0.640  |
| 1008            | 1010            | 3- $\delta$ -carene              | 0.64±0.34               |                |            |                |       |        |
| 1010            | 1013            | (E)-2-Hexenyl acetate            | 0.16±0.05               | 0.14±0.02      | 0.12±0.02  | 0.312          | 2, 20 | 0.856  |
| 1007            | 1014            | Hexyl acetate                    | 0.05±0.01               | 0.11±0.03      | 0.05±0.00  | 5.691          | 2, 20 | 0.058  |
| 1014            | 1016            | $\alpha$ -Terpinene              | 4.82±2.13b              | 0.88±0.43a,b   | 0.07±0.01a | 13.859         | 2, 25 | <0.001 |
| 1020            | 1025            | p-cymene                         | 0.34±0.11b              | 0.24±0.13a,b   | 0.01±0.01a | 9.762          | 2, 22 | 0.008  |
| 1030            | 1029            | Limonene                         | 8.42±3.79b              | 3.76±1.73b     | 0.25±0.01a | 12.369         | 2, 25 | 0.002  |
| 1031            | 1030            | $\beta$ -phelladrene             | 2.96±1.22b              | 0.80±0.36a,b   | 0.04±0.01a | 12.661         | 2, 25 | 0.002  |
| 1026            | 1031            | eucalyptol                       |                         | 2.60±1.30b     | 0.02±0.01a | 6.429          | 1, 13 | 0.011  |
| 1032            | 1035            | (Z)- $\beta$ -Ocimene            | 16.36±5.26b             | 8.26±2.96b     | 0.10±0.02a | 13.326         | 2, 25 | 0.001  |
| 1044            | 1048            | (E)- $\beta$ -Ocimene            | 85.10±24.07b            | 47.50±15.30b   | 2.43±0.45a | 13.326         | 2, 25 | 0.001  |
|                 | 1055            | Unknown 1                        |                         |                |            |                |       |        |
| 1059            | 1059            | $\gamma$ -Terpinene              | 5.80±2.23b              | 0.85±0.41a     | 0.08±0.01a | 15.335         | 2, 21 | <0.001 |
| 1086            | 1085            | $\alpha$ -terpinolene            | 1.59±0.63b              | 0.32±0.13a     |            | 6.189          | 1, 18 | 0.013  |
| 1092            | 1092            | 1-Undecene                       |                         | 0.12±0.03      |            |                |       |        |
| 1100            | 1100            | Undecane                         |                         | 0.22±0.06      |            |                |       |        |
| 1095            | 1101            | (Z)-3-Hexenyl propanoate         |                         | 0.13±0.07      |            |                |       |        |
| 1101            | 1101            | Linalool                         | 1.03±0.36               |                |            |                |       |        |
| 1100            | 1107            | n-Nonanal                        | 0.16±0.03               | 0.13±0.03      | 0.13±0.02  | 0.865          | 2, 24 | 0.649  |
| 1117            | 1117            | (E)-DMNT                         | 0.35±0.11a              | 0.81±0.36a,b   | 0.17±0.06a | 6.305          | 2, 25 | 0.043  |
| 1128            | 1128            | (E)-Allo-ocimene                 | 3.56±1.15               | 1.51±0.57      |            | 3.291          | 1, 20 | 0.070  |
| 1140            | 1141            | neo-allo-ocimene                 | 0.50±0.22               |                |            |                |       |        |
| 1142            | 1143            | (Z)-3-hexenyl isobutanoate       |                         | 0.10±0.02      |            |                |       |        |
| 1163            | 1168            | p-Ethylbenzaldehyde              | 0.13±0.02               |                |            |                |       |        |
| 1184            | 1184            | 4-Terpineol                      | 0.38±0.17               | 0.32±0.17      |            | 0.040          | 1, 14 | 0.841  |
| 1187            | 1187            | (Z)-3-Hexenyl butanoate          | 0.29±0.06               | 0.37±0.09      | 0.22±0.04  | 1.196          | 2, 25 | 0.550  |
| 1187            | 1192            | n-dodecene                       | 0.15±0.03a,b            | 0.32±0.06b     | 0.01±0.00a | 12.805         | 2, 21 | 0.002  |
| 1195            | 1195            | Methyl salicylate                | tr <sup>4</sup>         | tr             | tr         |                |       |        |
| 1200            | 1199            | n-Dodecane                       | 0.20±0.06               | 0.23±0.06      | 0.02±0.01  | 5.319          | 2, 21 | 0.070  |
| 1209            | 1209            | Decanal                          | 0.16±0.03               | 0.15±0.02      | 0.13±0.02  | 0.271          | 2, 21 | 0.873  |
| 1229            | 1232            | (Z)-3-Hexenyl 2-methyl butanoate | 0.06±0.01               | 0.07±0.01      | 0.04±0.00  | 3.576          | 2, 19 | 0.167  |
| 1237            | 1237            | (Z)-2-hexenyl isovalerate        | 0.08±0.01               | 0.10±0.02      |            | 1.333          | 1, 17 | 0.248  |
|                 | 1247            | Unknown 2                        | 0.55±0.15               |                |            |                |       |        |

|            |                             |            |            |              |        |       |       |  |
|------------|-----------------------------|------------|------------|--------------|--------|-------|-------|--|
| 1258       | Unknown 3                   | 0.79±0.21  |            |              |        |       |       |  |
| 1267       | m-Ethylacetophenone         | 3.08±0.90b |            | 0.12±0.01a   | 7.260  | 1, 15 | 0.007 |  |
| 01279 1288 | p-Ethylacetophenone         | 5.24±1.53b | 0.12±0.01a | 0.17±0.02a,b | 13.706 | 2, 21 | 0.001 |  |
| 1290 1291  | n-Tridecene                 | 0.14±0.05  | 0.23±0.05  |              | 0.960  | 1, 15 | 0.327 |  |
| 1300 1300  | n-Tridecane                 | 0.17±0.06  | 0.17±0.04  |              | 0.327  | 1, 19 | 0.568 |  |
| 1388 1393  | 1-Tetradecene               |            | 0.07±0.02  |              |        |       |       |  |
| 1400 1400  | n-Tetradecane               |            | 0.10±0.02  |              |        |       |       |  |
| 1407 1409  | Longifolene                 | 0.17±0.10  |            |              |        |       |       |  |
| 1419 1419  | (E)- $\beta$ -Caryophyllene | 1.65±0.31b | 1.36±0.20b | 0.08±0.02a   | 11.631 | 2, 25 | 0.003 |  |
| 1444 1438  | p-Acetylacetophenone        | 0.27±0.02  |            |              |        |       |       |  |
| 1453 1450  | (E)-Geranylacetone          |            |            | 0.08±0.02    |        |       |       |  |
| 1452 1457  | $\alpha$ -Humulene          | 0.30±0.07  | 0.16±0.01  |              | 2.438  | 1, 17 | 0.118 |  |
| 1484 1480  | Germacrene D                | 0.05±0.01  | 0.13±0.03  |              | 4.800  | 1, 11 | 0.028 |  |
| 1493 1490  | $\alpha$ -Zingiberene       | 0.05±0.00  |            | 0.09±0.04    | 0.048  | 1, 6  | 0.827 |  |
| 1493 1493  | 1-Pentadecene               |            | 0.10±0.03  |              |        |       |       |  |
| 1500 1500  | Pentadecane                 | 0.11±0.04  | 0.14±0.04  |              | 0.424  | 1, 16 | 0.515 |  |
| 1505 1504  | (E,E)- $\alpha$ -Farnesene  | 0.21±0.05  | 0.21±0.03  | 0.28±0.17    | 1.034  | 2, 25 | 0.596 |  |
| 1505 1505  | $\beta$ -bisabolene         | 0.08±0.01  |            |              |        |       |       |  |
| 1577 1579  | Spathulenol                 | 0.04±0.01  |            |              |        |       |       |  |
| 1582 1583  | Caryophyllene oxide         | 0.47±0.21  | 0.23±0.04  |              | 0.329  | 1, 18 | 0.566 |  |
| 1807 1807  | 2-Ethylhexyl salicylate     | 0.23±0.07a | 1.05±0.47b |              | 7.953  | 1, 16 | 0.005 |  |
| 1828 1830  | Isopropyl myristate         |            | 0.25±0.03  |              |        |       |       |  |

<sup>1</sup> RI: Retention Index values obtained from Adams [20] and the NIST database [21].

<sup>2</sup> RT<sub>c</sub>: Retention Index values were calculated relative to C<sub>7–30</sub> n-alkanes on a column with 5% diphenyl/95% dimethyl polysiloxane stationary phase.

<sup>3</sup> Different letters within a row, are significantly differ based on the Kruskal–Wallis test (p = 0.05).

<sup>4</sup> Detected in traces
