# Supplementary material
Source: MDPI journal article supplement (https://www.mdpi.com/2077-0472/13/10/1991)
Supplement: s1 [file s1]

**Table S4.** Volatile emissions of compounds detected in the headspace of nuts collected from Varnavas (NV), Fenos (NF) and Kastanitsa (NK), expressed in  $\mu\text{g h}^{-1} \pm \text{SE}$ .

| RI <sup>1</sup> | RI <sup>2</sup> | Compound                      | NV                        | NF           | NK             | X <sup>2</sup> | df, n | p     |
|-----------------|-----------------|-------------------------------|---------------------------|--------------|----------------|----------------|-------|-------|
| 864             | 868             | o-Xylene                      | 0.088±0.033               |              |                |                |       |       |
| 932             | 929             | $\alpha$ -pinene              |                           | 0.013±0.011  |                |                |       |       |
| 946             | 947             | Camphene                      |                           | 0.002±0.000  | 0.068±0.005    | 3.000          | 1, 5  | 0.083 |
| 974             | 978             | $\beta$ -pinene               |                           | 0.025±0.006  | 0.042±0.012    | 0.600          | 1, 4  | 0.439 |
| 981             | 988             | 6-Methyl-5-hepten-2-one       |                           | 0.024±0.013  |                |                |       |       |
| 995             | 990             | 2,2,4,6,6-Pentamethyl-heptane | 0.037±0.006               |              |                |                |       |       |
| 1008            | 1010            | 3- $\delta$ -carene           |                           | 0.024±0.012  |                |                |       |       |
| 1014            | 1016            | $\alpha$ -Terpinene           | 0.022±0.004               |              |                |                |       |       |
| 1020            | 1025            | p-cymene                      | 0.025±0.004               |              |                |                |       |       |
| 1030            | 1029            | Limonene                      | 0.049±0.005               | 0.253±0.156  |                | 3.750          | 1, 7  | 0.053 |
| 1031            | 1030            | $\beta$ -phelladrene          | 0.025±0.005               |              |                |                |       |       |
|                 | 1052            | Alkane 1                      | 0.011±0.001               |              |                |                |       |       |
|                 | 1055            | Unknown 1                     | 0.003±0.001               |              |                |                |       |       |
| 1059            | 1059            | $\gamma$ -Terpinene           | 0.043±0.009               |              |                |                |       |       |
| 1086            | 1085            | $\alpha$ -terpinolene         | 0.008±0.001               |              |                |                |       |       |
| 1100            | 1100            | Undecane                      | 0.061±0.019               |              |                |                |       |       |
| 1101            | 1101            | Linalool                      |                           | 0.192±0.019  | 0.227±0.048    | 0.333          | 1, 5  | 0.564 |
| 1100            | 1107            | n-Nonanal                     |                           | 0.089±0.034  |                |                |       |       |
| 1117            | 1117            | (E)-DMNT                      |                           | 0.120±0.083  | 0.130±0.017    | <0.001         | 1, 5  | 1.000 |
| 1150            | 1152            | Camphor                       |                           | 0.109±0.090  |                |                |       |       |
| 1184            | 1184            | 4-Terpineol                   | 0.008±0.003               |              |                |                |       |       |
| 1195            | 1195            | Methyl salicylate             |                           | 0.058±0.008  | 0.052±0.014    | 0.429          | 1, 6  | 0.513 |
| 1200            | 1199            | n-Dodecane                    |                           | 0.046±0.020  | 0.048±0.023    | 0.048          | 1, 6  | 0.827 |
| 1209            | 1209            | Decanal                       |                           | 0.129±0.033  |                |                |       |       |
|                 | 1272            | Alkane 2                      | 0.008±0.001               |              |                |                |       |       |
| 1300            | 1300            | n-Tridecane                   |                           | 0.029±0.025  |                |                |       |       |
|                 | 1348            | Alkane 3                      |                           | 0.042±0.025  |                |                |       |       |
|                 | 1374            | ester                         |                           | 0.055±0.024  |                |                |       |       |
| 1374            | 1376            | longicyclene                  | 0.010±0.000               |              |                |                |       |       |
| 1400            | 1400            | n-Tetradecane                 |                           | 0.048±0.037  |                |                |       |       |
| 1407            | 1409            | Longifolene                   | 0.015±0.002               |              |                |                |       |       |
| 1419            | 1419            | (E)- $\beta$ -Caryophyllene   | 0.008±0.000               | 0.014±0.006  | 0.009±0.002    | 1.149          | 2, 10 | 0.563 |
| 1419            | 1425            | $\beta$ -Cedrene              | 0.007±0.001               |              |                |                |       |       |
| 1429            | 1437            | cis-Thujopsene                | 0.022±0.005               |              |                |                |       |       |
| 1453            | 1450            | (E)-Geranylacetone            |                           | 0.050±0.025  | 0.035±0.025    | 0.429          | 1, 6  | 0.513 |
| 1452            | 1457            | $\alpha$ -Humulene            | 0.010±0.001               |              |                |                |       |       |
|                 | 1476            | terpene                       | 0.013±0.003               |              |                |                |       |       |
| 1484            | 1480            | Germacrene D                  | 0.008±0.001               |              | 0.012±0.002    | 1.190          | 1, 6  | 0.275 |
| 1489            | 1491            | $\beta$ -Selinene             | 0.008±0.001               |              |                |                |       |       |
| 1498            | 1497            | $\alpha$ -Selinene            | 0.006±0.000               |              |                |                |       |       |
| 1500            | 1500            | Pentadecane                   |                           | 0.055±0.044  |                |                |       |       |
| 1505            | 1504            | (E,E)- $\alpha$ -Farnesene    | 0.010±0.002a <sup>3</sup> | 0.086±0.034b | 0.017±0.001a,b | 8.727          | 2, 11 | 0.013 |
| 1600            | 1600            | n-hexadecane                  |                           | 0.051±0.040  |                |                |       |       |
| 1640            | 1634            | Hinesol                       | 0.013±0.003               |              |                |                |       |       |
|                 | 1637            | terpene                       | 0.012±0.004               |              |                |                |       |       |
| 1652            | 1659            | $\alpha$ -Eudesmol            | 0.098±0.021               |              |                |                |       |       |
| 1700            | 1701            | Heptadecane                   | 0.048±0.027               |              |                |                |       |       |

|      |      |                     |             |
|------|------|---------------------|-------------|
| 1800 | 1800 | Octadecane          | 0.009±0.004 |
| 1828 | 1830 | Isopropyl myristate | 0.014±0.003 |

<sup>1</sup> RI: Retention Index values obtained from Adams [20] and the NIST database [21].

<sup>2</sup> RT<sub>c</sub>: Retention Index values were calculated relative to C<sub>7–30</sub> n-alkanes on a column with 5% diphenyl/95% dimethyl polysiloxane stationary phase.

<sup>3</sup> Different letters within a row, are significantly differ based on the Kruskal–Wallis test (p = 0.05).
