# Supplementary material
Source: MDPI journal article supplement (https://www.mdpi.com/2077-0472/13/10/1991)
Supplement: s1 [file s1]

**Table S1.** Volatile emissions of compounds detected in the headspace of catkins collected from Varnavas (CV), Fenos (CF) and Kastanitsa (CK), expressed in  $\mu\text{g h}^{-1} \pm \text{SE}$ .

| RI <sup>1</sup> | RI <sup>2</sup> | Compound                         | CV                      | CF            | CK             | X <sup>2</sup> | df, n | p      |
|-----------------|-----------------|----------------------------------|-------------------------|---------------|----------------|----------------|-------|--------|
| 797             | 798             | (Z)-3-Hexenal                    |                         |               | 2.71±0.87      |                |       |        |
| 802             | 798             | Ethyl butanoate                  | 1.55±0.70               | 0.78±0.20     | 2.01±0.50      | 2.005          | 2, 17 | 0.367  |
| 846             | 841             | Ethyl 2-methylbutanoate          | 0.34±0.04               | 0.58±0.12     |                | 2.817          | 1, 14 | 0.093  |
| 850             | 849             | (Z)-3-Hexen-1-ol                 | 1.69±0.69a <sup>3</sup> | 4.67±0.75a,b  | 7.90±1.96b     | 8.390          | 2, 20 | 0.015  |
| 854             | 852             | (Z)-2-Hexen-1-ol                 | 0.31±0.03               |               |                |                |       |        |
| 863             | 860             | n-Hexanol                        | 0.78±0.23               |               |                |                |       |        |
| 911             | 913             | n-Amyl acetate                   |                         |               | 0.30±0.03      |                |       |        |
| 924             | 925             | $\alpha$ -thujene                |                         | 0.78±0.17     | 0.34±0.16      | 2.893          | 1, 11 | 0.089  |
| 932             | 929             | $\alpha$ -pinene                 | 0.25±0.06b              | 9.30±1.87a    | 3.28±1.20a,b   | 14.310         | 2, 20 | <0.001 |
| 938             | 935             | Ethyl tiglate                    | 0.16±0.02               |               |                |                |       |        |
| 946             | 947             | Camphene                         | 0.23±0.08b              | 1.12±0.19a    | 0.96±0.17a     | 10.462         | 2, 20 | 0.005  |
| 969             | 970             | Sabinene                         | 0.79±0.07a              | 141.05±18.74b | 56.51±17.20a,b | 14.700         | 2, 20 | <0.001 |
| 974             | 978             | $\beta$ -pinene                  | 0.26±0.05a              | 13.62±1.91b   | 6.14±2.48a,b   | 12.498         | 2, 18 | 0.002  |
| 988             | 988             | $\beta$ -Myrcene                 | 0.87±0.20a              | 34.25±7.59b   | 13.28±5.40a,b  | 13.456         | 2, 20 | 0.001  |
| 993             | 993             | Butyl butyrate                   |                         | 0.58±0.27     |                |                |       |        |
| 997             | 998             | Ethyl hexanoate                  | 0.23±0.05               | 0.25±0.08     | 0.21±0.01      | 0.123          | 2, 16 | 0.940  |
| 1001            | 1006            | (E)-3-Hexenyl acetate            | 0.08±0.02a              | 0.36±0.05b    | 0.31±0.05b     | 10.101         | 2, 19 | 0.006  |
| 1004            | 1008            | (Z)-3-Hexenyl acetate            | 5.12±2.17a              | 51.27±7.21b   | 80.96±20.34b   | 12.533         | 2, 20 | 0.002  |
| 1010            | 1013            | (E)-2-Hexenyl acetate            | 0.10±0.03a              | 0.60±0.08b    | 0.56±0.10b     | 9.851          | 2, 16 | 0.007  |
| 1007            | 1014            | Hexyl acetate                    | 0.08±0.02a              | 0.52±0.17b    | 0.66±0.22b     | 10.535         | 2, 18 | 0.005  |
| 1014            | 1016            | $\alpha$ -Terpinene              | 0.10±0.01a              | 3.37±0.78b    | 1.15±0.42a,b   | 13.724         | 2, 20 | 0.001  |
| 1020            | 1025            | p-cymene                         | 0.04±0.02a              | 0.31±0.09b    | 0.37±0.26a,b   | 8.357          | 2, 17 | 0.015  |
| 1030            | 1029            | Limonene                         | 0.25±0.04a              | 13.33±2.45b   | 4.34±1.63a,b   | 14.700         | 2, 20 | <0.001 |
| 1031            | 1030            | $\beta$ -phelladrene             | 0.02±0.00a              | 3.03±0.62b    | 0.78±0.28a,b   | 11.575         | 2, 17 | 0.003  |
| 1026            | 1031            | eucalyptol                       | 0.07±0.02a              | 2.79±0.64b    | 0.84±0.34a,b   | 12.729         | 2, 19 | 0.002  |
| 1032            | 1035            | (Z)- $\beta$ -Ocimene            | 6.56±1.97               | 8.03±1.92     | 19.35±5.65     | 4.190          | 2, 20 | 0.123  |
| 1037            | 1039            | Benzyl alcohol                   |                         | 1.10±0.29     |                |                |       |        |
| 1044            | 1048            | (E)- $\beta$ -Ocimene            | 151.18±46.90            | 131.82±30.13  | 226.87±43.80   | 2.538          | 2, 20 | 0.281  |
| 1059            | 1059            | $\gamma$ -Terpinene              | 0.06±0.00a              | 3.08±0.70b    | 0.93±0.50a,b   | 12.643         | 2, 20 | 0.002  |
| 1061            | 1062            | $\alpha$ -Methyl Benzenemethanol | 0.09±0.02               | 0.14±0.07     | 0.21±0.05      | 3.868          | 2, 15 | 0.145  |
| 1059            | 1069            | Acetophenone                     | 4.71±1.08               | 2.66±0.82     | 6.08±1.87      | 3.485          | 2, 19 | 0.175  |
| 1086            | 1085            | $\alpha$ -terpinolene            | 0.04±0.01a              | 0.79±0.18b    | 0.29±0.11a,b   | 12.190         | 2, 18 | 0.002  |
| 1084            | 1087            | (E)-Linalool oxide (furanoid)    | 0.43±0.09a              | 1.25±0.18b    | 0.92±0.08a,b   | 9.994          | 2, 19 | 0.007  |
| 1099            | 1096            | $\alpha$ -Pinene oxide           | 0.31±0.01a              |               | 0.76±0.07b     | 5.000          | 1, 8  | 0.025  |
| 1099            | 1097            | Methyl benzoate                  | 0.32±0.05               | 0.50±0.07     |                | 4.000          | 1, 13 | 0.046  |
| 1095            | 1101            | (Z)-3-Hexenyl propanoate         |                         |               | 0.40±0.06      |                |       |        |
| 1101            | 1101            | Linalool                         | 0.42±0.07               | 0.76±0.25     | 0.80±0.15      | 3.667          | 2, 19 | 0.160  |
| 1100            | 1107            | n-Nonanal                        | 0.10±0.01               | 0.18±0.04     | 0.22±0.05      | 5.637          | 2, 19 | 0.060  |
| 1117            | 1117            | (E)-DMNT                         | 2.47±0.56               | 2.15±0.57     | 2.52±0.64      | 1.027          | 2, 20 | 0.598  |
| 1128            | 1128            | (E)-Allo-ocimene                 | 1.48±0.42               | 1.52±0.48     | 4.18±1.21      | 5.333          | 2, 20 | 0.069  |
| 1130            | 1132            | (E,E)-Cosmene                    | 0.46±0.10               |               |                |                |       |        |
| 1140            | 1141            | neo-allo-ocimene                 | 0.46±0.14               | 0.31±0.08     |                | 0.750          | 1, 8  | 0.386  |

|      |      |                                         |             |              |              |        |       |       |
|------|------|-----------------------------------------|-------------|--------------|--------------|--------|-------|-------|
| 1142 | 1143 | (Z)-3-hexenyl isobutanoate              | 0.08±0.02a  | 0.10±0.02a   | 0.35±0.05b   | 9.708  | 2, 15 | 0.008 |
| 1169 | 1173 | Ethyl benzoate                          | 1.05±0.33   | 1.39±0.27    | 0.53±0.10    | 4.953  | 2, 18 | 0.084 |
| 1184 | 1184 | (Z)-Cinerone                            | 0.18±0.06   |              |              |        |       |       |
| 1184 | 1184 | 4-Terpineol                             |             | 0.26±0.11    |              |        |       |       |
| 1187 | 1187 | (Z)-3-Hexenyl butanoate                 | 0.32±0.13a  | 0.52±0.07a,b | 2.24±0.61b   | 10.348 | 2, 20 | 0.006 |
| 1187 | 1192 | n-dodecene                              |             | 0.13±0.03    |              |        |       |       |
| 1191 | 1193 | Hexyl butanoate                         | 0.12±0.03   |              |              |        |       |       |
| 1195 | 1195 | Methyl salicylate                       | 0.41±0.05   | 0.53±0.08    | 0.51±0.08    | 0.837  | 2, 20 | 0.658 |
| 1200 | 1199 | n-Dodecane                              | 0.03±0.00   | 0.07±0.02    |              | 4.800  | 1, 11 | 0.028 |
| 1209 | 1209 | Decanal                                 | 0.05±0.01a  |              | 0.19±0.08b   | 5.000  | 1, 8  | 0.025 |
|      |      | (3E,5E)-2,6-                            | 0.08±0.02   |              |              |        |       |       |
| 1209 | 1211 | Dimethylocta-3,5,7-trien-2-ol           |             |              |              |        |       |       |
| 1229 | 1232 | (Z)-3-Hexenyl 2-methyl butanoate        | 0.11±0.03   | 0.18±0.04    | 0.38±0.09    | 5.529  | 2, 19 | 0.063 |
| 1237 | 1237 | (Z)-2-hexenyl isovalerate               | 0.06±0.01a  | 0.19±0.05b   | 0.17±0.02b   | 9.047  | 2, 16 | 0.011 |
|      | 1258 | Unknown 3                               | 0.06±0.03   | 0.18±0.04    |              | 4.321  | 1, 11 | 0.038 |
|      | 1267 | m-Ethylacetophenone                     |             | 0.27±0.04    | 0.25±0.02    | 0.165  | 1, 12 | 0.685 |
| 1270 | 1271 | Ethyl salicylate                        | 0.17±0.04a  | 0.39±0.06b   | 0.25±0.02a,b | 10.781 | 2, 16 | 0.005 |
| 1279 | 1288 | p-Ethylacetophenone                     |             | 0.37±0.05    |              |        |       |       |
| 1300 | 1300 | n-Tridecane                             | 0.02±0.01   |              |              |        |       |       |
| 1319 | 1324 | (Z)-Hex-3-enyl (E)-2-methylbut-2-enoate | 0.04±0.01   |              |              |        |       |       |
| 1335 | 1330 | δ-Elemene                               | 0.03±0.00   |              |              |        |       |       |
| 1374 | 1374 | α-Copaene                               | 0.06±0.01   |              |              |        |       |       |
| 1378 | 1381 | (Z)-3-hexenyl hexanoate                 | 0.08±0.01   |              | 0.13±0.02    | 2.400  | 1, 9  | 0.121 |
| 1400 | 1400 | n-Tetradecane                           | 0.03±0.01   |              |              |        |       |       |
| 1407 | 1409 | Longifolene                             | 0.03±0.01   |              |              |        |       |       |
| 1419 | 1419 | (E)-β-Caryophyllene                     | 0.62±0.10   | 1.03±0.30    | 0.41±0.10    | 2.990  | 2, 20 | 0.224 |
| 1419 | 1425 | β-Cedrene                               | 0.06±0.02   |              |              |        |       |       |
| 1452 | 1457 | α-Humulene                              | 0.08±0.01   |              |              |        |       |       |
| 1458 | 1459 | allo-Aromadendrene                      | 0.03±0.00   |              |              |        |       |       |
| 1462 | 1462 | cis-Muurola-4(15),5-diene               | 0.05±0.01   |              |              |        |       |       |
| 1484 | 1480 | Germacrene D                            | 0.45±0.17   | 0.34±0.10    | 0.25±0.03    | 0.834  | 2, 19 | 0.659 |
| 1493 | 1490 | α-Zingiberene                           | 0.50±0.29a  | 0.50±0.05a,b | 0.97±0.11b   | 6.548  | 2, 20 | 0.038 |
| 1494 | 1495 | Bicyclogermacrene                       | 0.13±0.03   | 0.06±0.01    |              | 2.133  | 1, 11 | 0.144 |
| 1500 | 1500 | Pentadecane                             |             | 0.05±0.02    | 0.02±0.00    | 4.000  | 1, 8  | 0.046 |
| 1505 | 1504 | (E,E)-α-Farnesene                       | 23.50±13.57 | 2.33±0.88    | 5.91±0.99    | 6.919  | 2, 20 | 0.031 |
| 1513 | 1513 | γ-Cadinene                              | 0.04±0.01   |              |              |        |       |       |
| 1522 | 1518 | δ-Cadinene                              | 0.04±0.01   |              |              |        |       |       |
| 1561 | 1562 | (E)-Nerolidol                           | 0.04±0.01   |              |              |        |       |       |
| 1565 | 1574 | (Z)-3-Hexenyl benzoate                  | 0.12±0.03   | 0.21±0.07    | 0.12±0.01    | 1.764  | 2, 19 | 0.414 |
| 1577 | 1579 | Spathulenol                             | 0.03±0.01   | 0.03±0.01    |              | 0.060  | 1, 9  | 0.806 |
|      | 1597 | sesquiterpene                           |             |              | 0.45±0.05    |        |       |       |
| 1582 | 1583 | Caryophyllene oxide                     | 0.07±0.01   | 0.20±0.05    |              | 3.753  | 1, 10 | 0.053 |

|      |      |                     |           |
|------|------|---------------------|-----------|
| 1828 | 1830 | Isopropyl myristate | 0.10±0.01 |
|------|------|---------------------|-----------|

<sup>1</sup> RI: Retention Index values obtained from Adams [20] and the NIST database [21].

<sup>2</sup> RT<sub>c</sub>: Retention Index values were calculated relative to C<sub>7–30</sub> n-alkanes on a column with 5% diphenyl/95% dimethyl polysiloxane stationary phase.

<sup>3</sup> Different letters within a row, are significantly differ based on the Kruskal–Wallis test (p = 0.05).
